# Supplementary material for: The Effect of Temperature on the Embryo Development of <em>Sepiella japonica</em> Suggests Crosstalk Between Autophagy and Apoptosis
Source: Preprints.org preprint supplement (doi:10.20944/preprints202309.1902.v1), 2023-09-28
Supplement: Supplementary file 3 [file supplementary]

**Tables**

Table. 1. Primers used for real-time quantitative PCR

| **Genes** | **Sequences (5'-3')** | **References** |
| --- | --- | --- |
| *β-actin-*F | GCCAGTTGCTCGTTACAG | JN564496.1 |
| *β-actin-R* | GCCAACAATAGATGGGAAT |
| *GAPDH-F* | TGGTTCCTTGGCTTTTGCT | Huo et al., 2018 |
| *GAPDH-R* | GGTGGTGGTGCGGGTAGT |
| *Inx4-*F | ACGCGCCATATAATACACGG |  |
| *Inx4-R* | CGTGGTCCCTAGCGAGATAC |
| *LC3-*F | CGCCGTTTACAGTTGCATCC |  |
| *LC3-*R | GCCGTCGTCATCTTTTTCCC |
| *BECN1-*F | GCCAACTGGAAAAATTGACC |  |
| *BECN1-*R | AGAATCGGAATCCTCCTGAA |
| *Cas3-F* | TGCAAAAACGGTTCCTGGTT |  |
| *Cas3-R* | AGTCAACATAGAGGCAACGCA |
| *p53-F* | GCCTGTATCATCAACTCCAT |  |
| *p53-R* | AGAATAAGTCCAGGTTGTAG |
